# Supplementary material for: Subject specific muscle synergies and mechanical output during cycling with arms or legs
Source: PeerJ journal article supplement (doi:10.7717/peerj.13155), 2022-03-29
Supplement: English_codebook_data.pdf [file English_codebook_data.pdf]

Data for upper limbs (U) or lower limbs (L) cycling for each subject :

- 1 Lode.csv for torque data
- 1 c3d for kinematics data
- 2 csv for EMG data (Wingate + experiment)

Codebook:

In Lode.csv :

- Complexe = revolution
- Heure de début = Starting timing
- Puissance moyenne = Mean power
- TPM moyen = mean rotation per minute
- Couple de pédale gauche/droit = left/right crank torque
- Heure du delta = timing apparition of the sample during the revolution

In emg.csv :

The first 4 columns concern the Quattro electrodes.

For Legs, corresponding muscles are : SOL / GL / GM / TA

For arms, corresponding muscles are : FDS / FCR / BR / ECRL
