# Supplementary material for: Subject specific muscle synergies and mechanical output during cycling with arms or legs
Source: PeerJ journal article supplement (doi:10.7717/peerj.13155), 2022-03-29

LOWER LIMBS

Pairwise correlations of each variable.

Bottom corner: graphical representation. Each point represents the occurrence of a cycle for each participant. A linear regression is shown. Upper corner: associated  $r$ ,  $r^2$  and  $p$ -value. Diagonal: distribution of each variable.

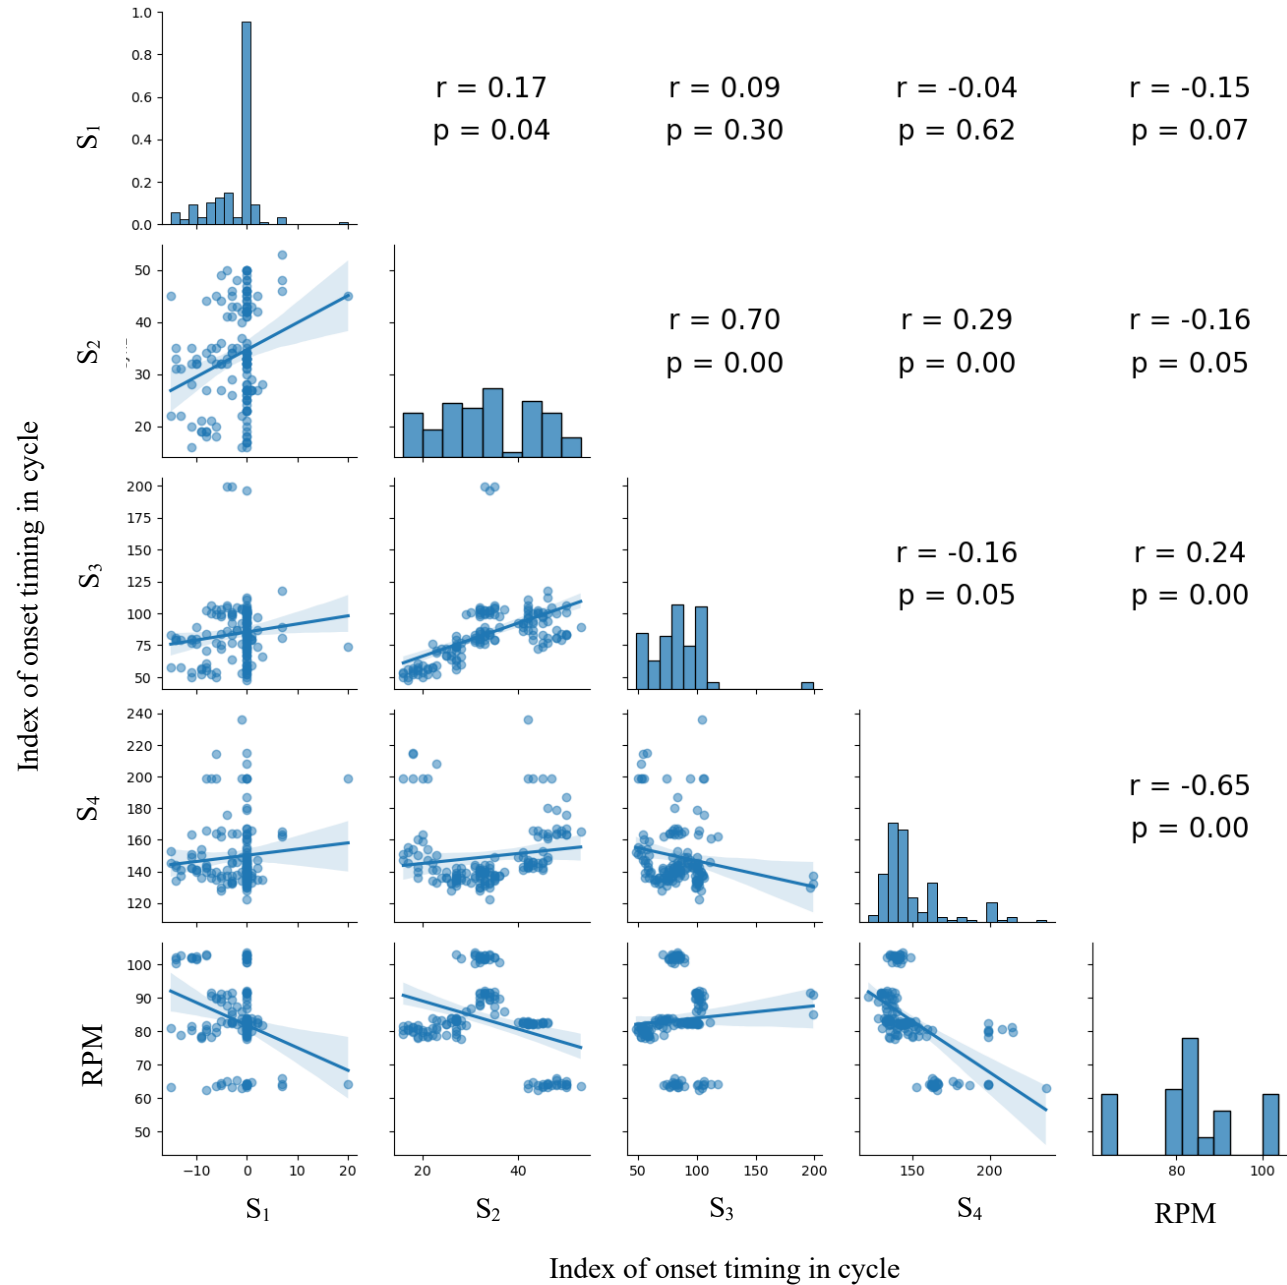

Supplement: Supp_Fig_2.pdf [file Supp_Fig_2.pdf]
