# Supplementary material for: Subject specific muscle synergies and mechanical output during cycling with arms or legs
Source: PeerJ journal article supplement (doi:10.7717/peerj.13155), 2022-03-29

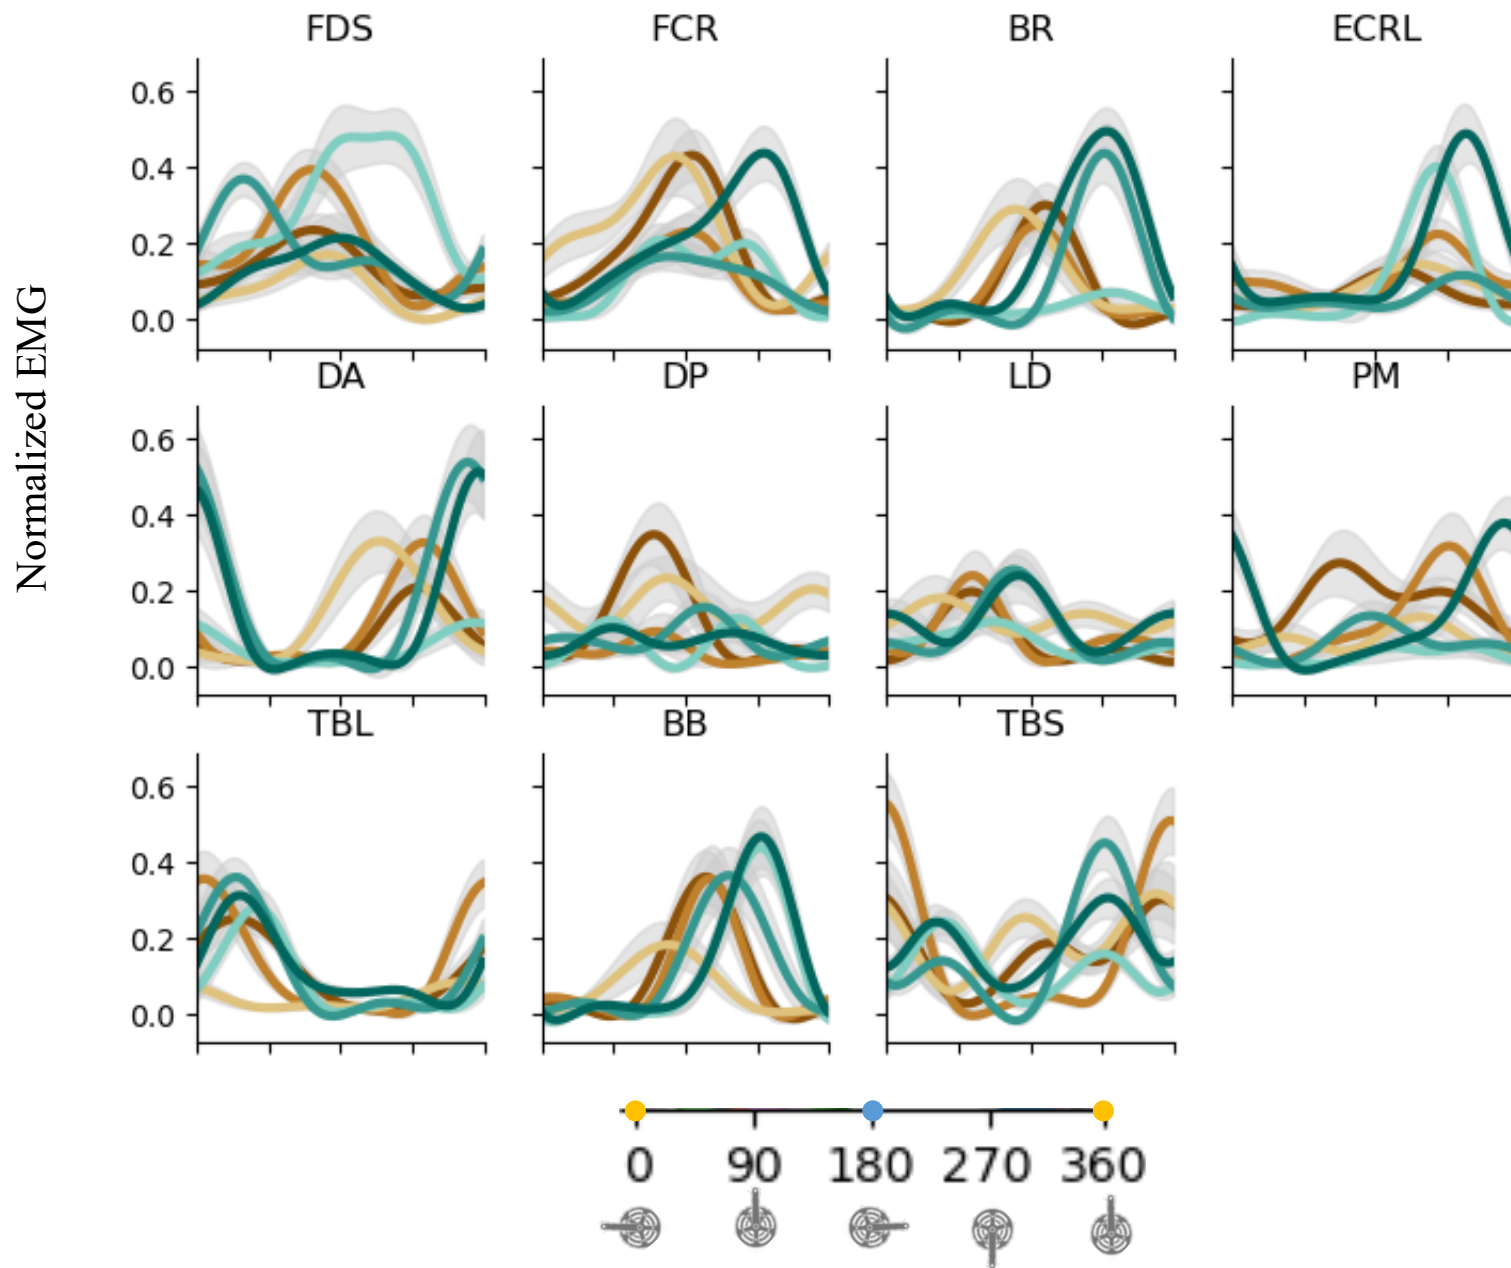

Supplement: Supp_Fig_3.pdf [file Supp_Fig_3.pdf]
