# Supplementary material for: Subject specific muscle synergies and mechanical output during cycling with arms or legs
Source: PeerJ journal article supplement (doi:10.7717/peerj.13155), 2022-03-29

Normalized EMG

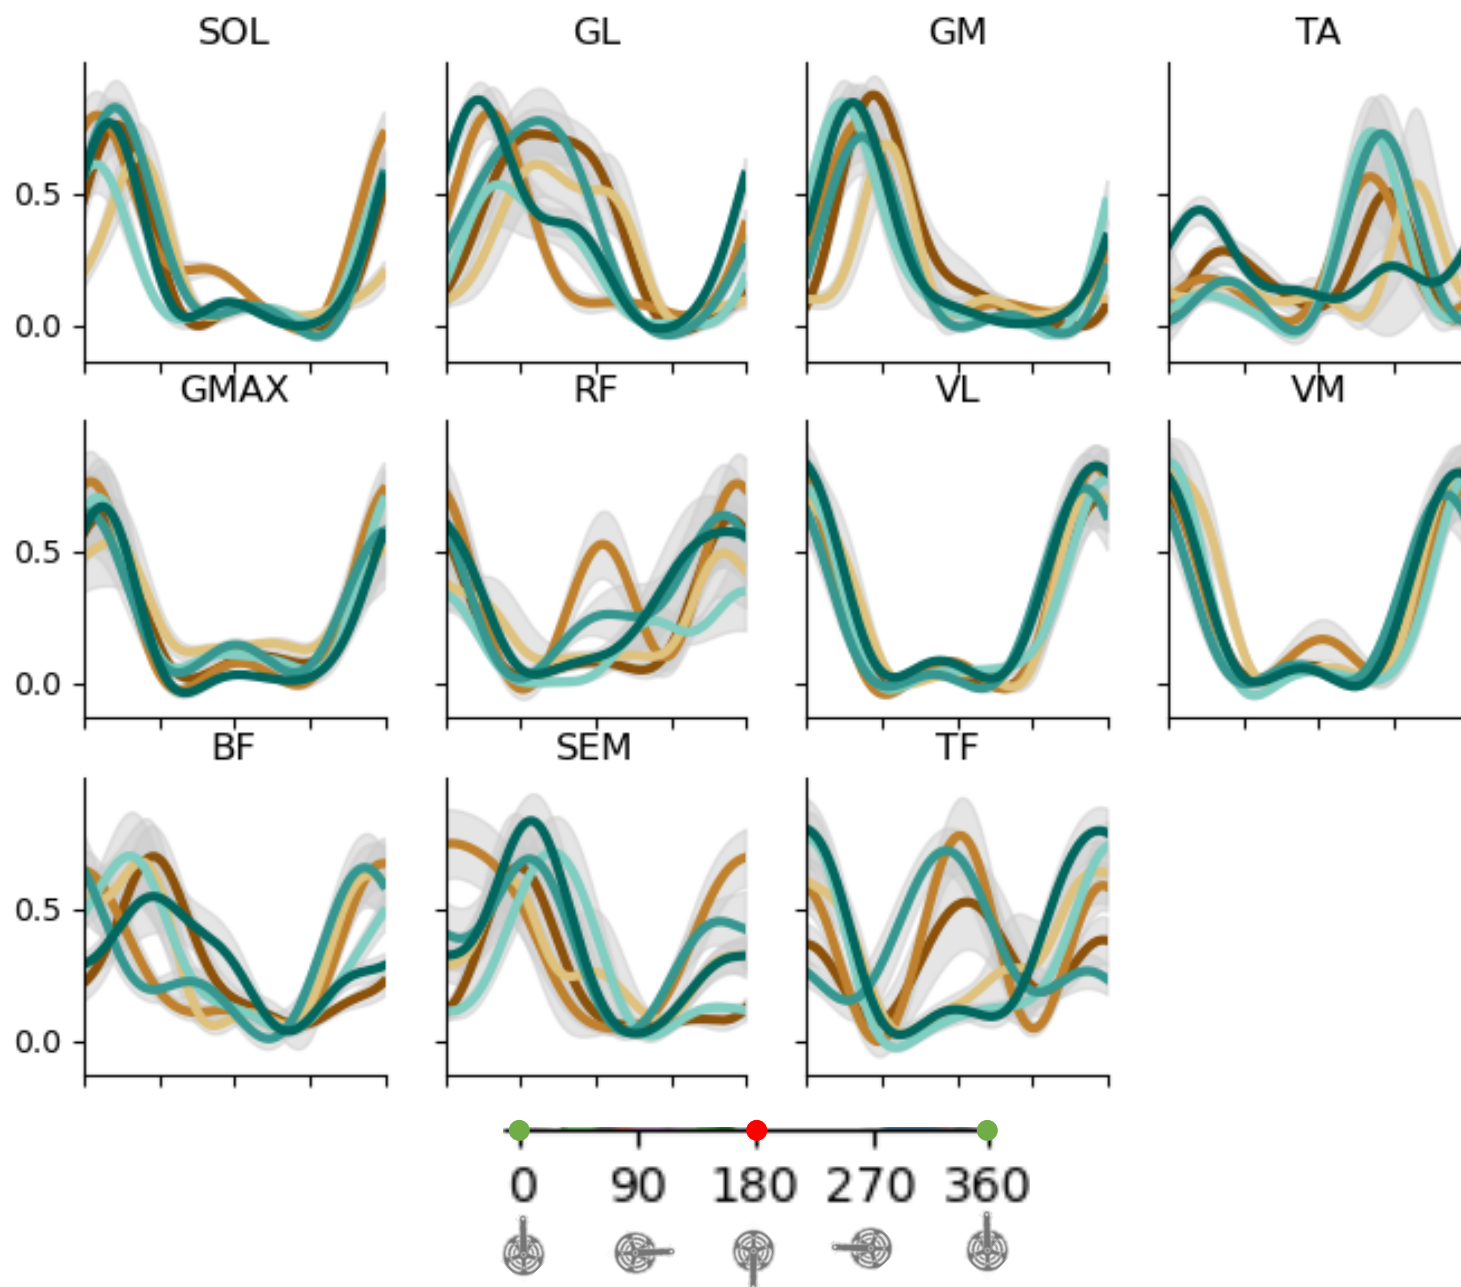

Supplement: Supp_Fig_4.pdf [file Supp_Fig_4.pdf]
